# Supplementary material
Source: PubMed Central journal article supplement (PMC6038912)

stained with antibody 6E10

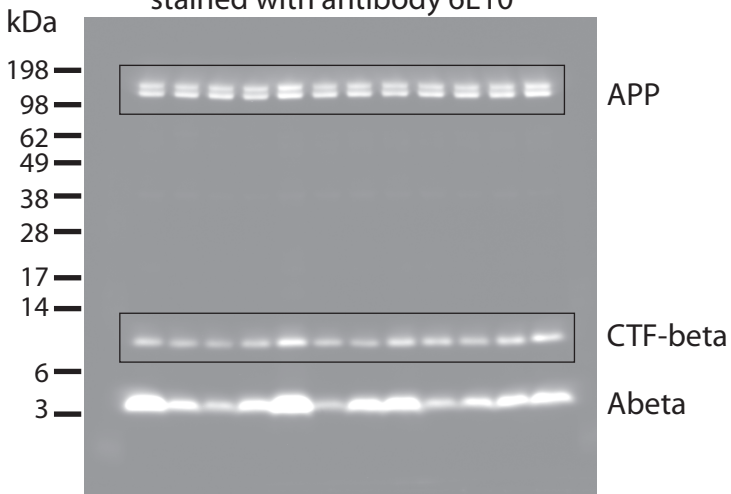

reprobed with antibody against GAPDH

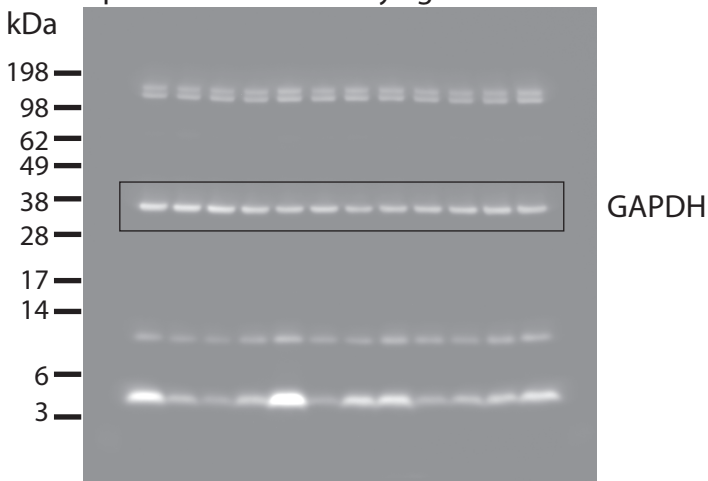

Supplement: NIHMS76343-supplement-Sup_Figure_1.pdf [file NIHMS76343-supplement-Sup_Figure_1.pdf]
